# Supplementary material for: Health and Care Dependency of Older Adults in Dresden, Germany: Results from the LAB60+ Study
Source: MDPI journal article supplement (doi:10.3390/ijerph191811777), 2022-09-18

**Table S1.** List of comorbidities given in the LAB60+ questionnaire

Do you have or have you had any of the following conditions? (multiple answers possible)

|                             |                               |
|-----------------------------|-------------------------------|
| None                        | Diabetes                      |
| High blood pressure         | Heart failure                 |
| Coronary heart disease      | Heart attack                  |
| Osteoarthritis              | Chronic pain (e.g. back pain) |
| Osteoporosis                | Rheumatism                    |
| Depression                  | Stroke                        |
| Lung disease (e.g. COPD)    | Dizziness                     |
| Dementia (e.g. Alzheimer's) | Cancer (in the past 5 years)  |
| Eye disease (e.g. cataract) | Hearing impairment            |
| Incontinence                | Others, namely:               |

### Evaluation of degree of care in Germany

(from Bundesministerium für Gesundheit. Online-Ratgeber Pflege: Pflegegrade. Available online: <https://www.bundesgesundheitsministerium.de/pflegegrade.html> (accessed on 12.10.2021).

To determine how independent a person in need of care is, the assessor takes a close look at the following six areas of life:

Module 1 "Mobility": the assessor looks at physical mobility. For example, can the person get up and walk from the bed to the bathroom on his or her own? Can he or she move around independently within his or her own four walls, is climbing stairs possible?

Module 2 "Mental and communicative abilities": This area includes understanding and talking. For example: Can the person concerned orient himself in time and space? Does he or she understand facts, recognize risks and can he or she hold conversations with other people?

Module 3 "Behavioral and psychological problems": This includes restlessness at night or fears and aggression, which are stressful for the person in need of care, but also for their relatives. This is also taken into account if there are defensive reactions to nursing measures.

Module 4 "Self-care": For example, can the applicant wash and dress him/herself, can he/she go to the toilet independently and eat and drink?

Module 5 "Dealing independently with requirements and stresses caused by illness or therapy - and coping with them": The assessor looks at whether the person concerned can, for example, take medication him/herself, measure blood sugar independently, use aids such as prostheses or a walker, and see a doctor.

Module 6 "Shaping everyday life and social contacts": For example, can the person concerned organize his or her daily routine independently? Can he or she come into direct contact with other people or go to the skat club without help?

For each criterion in the above-mentioned areas of life, the assessors determine the degree of independence of the person in need of care, usually on the basis of a point value between 0 (person can perform activity without a helping person, if necessary with aids) and - 3 (person cannot perform the activity, not even in parts). At the end, the points with different weighting are combined to a total value, which stands for one of the five degrees of care. The five care grades are graduated: from minor impairments of independence or abilities (care grade 1) to the most severe impairments of independence or abilities that are accompanied by special requirements for nursing care (care grade 5), as shown in Table A2:

**Table S2.** Description of degree of care

| Degree of care | Number of total points | Definition                                                                                      |
|----------------|------------------------|-------------------------------------------------------------------------------------------------|
| 1              | 12.5 to <27            | minor impairments of independence or abilities                                                  |
| 2              | 27 to <47.5            | significant impairment of independence or abilities                                             |
| 3              | 47.5 to <70            | severe impairment of independence or abilities                                                  |
| 4              | 70 to <90              | most severe impairment of independence or abilities                                             |
| 5              | 90 to 100              | most severe impairments of independence or abilities with special requirements for nursing care |

**Table S3.** Mean scores of the SF-8 sub- and total scales by 5-year age groups and gender.

|             | GH       |                   | PF       |                   | RP       |                   | BP       |                   | VT       |                   | SF       |                   | MH       |                   | RE       |                   | PCS-8    |                   | MCS-8    |                   |
|-------------|----------|-------------------|----------|-------------------|----------|-------------------|----------|-------------------|----------|-------------------|----------|-------------------|----------|-------------------|----------|-------------------|----------|-------------------|----------|-------------------|
|             | <i>M</i> | 95%-<br><i>CI</i> |
| 60-64 years |          |                   |          |                   |          |                   |          |                   |          |                   |          |                   |          |                   |          |                   |          |                   |          |                   |
| Women       | 46.7     | (45.9-47.5)       | 47.4     | (46.5-48.3)       | 47.7     | (46.7-48.6)       | 50.9     | (49.8-52.1)       | 49.6     | (48.7-50.5)       | 47.6     | (46.4-48.8)       | 47.2     | (45.9-48.5)       | 46.6     | (45.6-47.6)       | 48.8     | (47.7-45.0)       | 47.5     | (46.1-48.9)       |
| Men         | 46.1     | (45.3-47.1)       | 47.0     | (46.0-47.9)       | 47.3     | (46.3-48.3)       | 50.0     | (48.8-51.1)       | 49.5     | (48.6-50.4)       | 47.0     | (45.7-48.3)       | 48.7     | (47.5-49.9)       | 46.1     | (45.1-47.2)       | 47.6     | (46.5-48.7)       | 48.5     | (47.2-49.8)       |
| Total       | 46.4     | (45.8-47.0)       | 47.2     | (46.6-47.9)       | 47.5     | (46.8-48.2)       | 50.4     | (49.6-51.3)       | 49.5     | (48.9-50.2)       | 47.3     | (46.4-48.2)       | 48.0     | (47.1-48.8)       | 46.4     | (45.7-47.1)       | 48.2     | (47.5-49.0)       | 48.0     | (47.1-49.0)       |
| 65-69 years |          |                   |          |                   |          |                   |          |                   |          |                   |          |                   |          |                   |          |                   |          |                   |          |                   |
| Women       | 45.9     | (45.1-46.7)       | 46.6     | (45.6-47.6)       | 47.6     | (46.6-48.6)       | 50.2     | (49.0-51.4)       | 49.1     | (48.1-50.0)       | 47.4     | (46.2-48.5)       | 47.9     | (46.7-49.0)       | 46.7     | (45.8-47.6)       | 47.9     | (46.7-49.1)       | 48.1     | (46.8-49.3)       |
| Men         | 46.9     | (46.1-47.8)       | 47.3     | (46.2-48.3)       | 47.7     | (46.6-48.7)       | 52.6     | (51.4-53.7)       | 50.3     | (49.4-51.2)       | 49.4     | (48.2-50.5)       | 50.4     | (49.3-51.5)       | 48.2     | (47.3-49.1)       | 48.6     | (47.4-49.8)       | 51.1     | (49.8-52.3)       |
| Total       | 46.4     | (45.8-47.0)       | 46.9     | (46.2-47.6)       | 47.6     | (46.9-48.3)       | 51.3     | (50.5-52.1)       | 49.7     | (49.0-50.3)       | 48.3     | (47.5-49.1)       | 49.1     | (48.3-49.9)       | 47.4     | (46.8-48.1)       | 48.2     | (47.4-49.0)       | 49.5     | (48.6-50.4)       |
| 70-74 years |          |                   |          |                   |          |                   |          |                   |          |                   |          |                   |          |                   |          |                   |          |                   |          |                   |
| Women       | 44.8     | (44.0-45.6)       | 44.2     | (43.0-45.4)       | 45.3     | (44.1-46.4)       | 47.2     | (45.8-48.5)       | 47.5     | (46.5-48.5)       | 45.3     | (43.8-46.7)       | 47.4     | (46.1-48.7)       | 45.8     | (44.9-46.8)       | 44.7     | (43.3-46.0)       | 47.4     | (46.0-48.8)       |
| Men         | 45.1     | (44.1-46.1)       | 45.2     | (43.8-46.7)       | 46.4     | (45.1-47.8)       | 50.2     | (48.8-51.6)       | 49.1     | (48.0-50.2)       | 47.9     | (46.4-49.4)       | 50.9     | (49.7-52.1)       | 47.3     | (46.2-48.5)       | 45.9     | (44.3-47.5)       | 51.1     | (49.7-52.4)       |
| Total       | 44.9     | (44.3-45.5)       | 44.6     | (43.7-45.5)       | 45.8     | (44.9-46.7)       | 48.4     | (47.4-49.4)       | 48.2     | (47.5-49.0)       | 46.4     | (45.4-47.5)       | 48.9     | (48.0-49.8)       | 46.5     | (45.7-47.2)       | 45.2     | (44.2-46.2)       | 49.0     | (48.0-45.0)       |
| 75-79 years |          |                   |          |                   |          |                   |          |                   |          |                   |          |                   |          |                   |          |                   |          |                   |          |                   |
| Women       | 43.3     | (42.6-44.1)       | 41.7     | (40.5-42.8)       | 42.9     | (41.7-44.1)       | 46.2     | (44.9-47.4)       | 46.2     | (45.3-47.1)       | 44.5     | (43.3-45.8)       | 46.4     | (45.2-47.6)       | 44.6     | (43.6-45.5)       | 42.2     | (40.9-43.6)       | 46.6     | (45.3-47.9)       |
| Men         | 44.2     | (43.5-45.0)       | 43.9     | (42.8-45.0)       | 44.8     | (43.7-46.0)       | 48.4     | (47.1-49.6)       | 47.9     | (47.1-48.8)       | 46.7     | (45.3-48.0)       | 49.4     | (48.2-50.6)       | 46.5     | (45.5-47.5)       | 44.2     | (42.9-45.5)       | 49.6     | (48.3-51.0)       |
| Total       | 43.8     | (43.2-44.3)       | 42.7     | (41.9-43.5)       | 43.8     | (43.0-44.7)       | 47.2     | (46.3-48.1)       | 47.0     | (46.4-47.6)       | 45.5     | (44.6-46.4)       | 47.8     | (47.0-48.6)       | 45.5     | (44.7-46.2)       | 43.1     | (42.2-44.1)       | 48.0     | (47.1-49.0)       |
| 80-84 years |          |                   |          |                   |          |                   |          |                   |          |                   |          |                   |          |                   |          |                   |          |                   |          |                   |
| Women       | 41.3     | (40.4-42.3)       | 39.0     | (37.7-40.4)       | 39.6     | (38.2-41.0)       | 43.6     | (42.1-45.0)       | 43.9     | (42.9-45.0)       | 42.7     | (41.2-44.3)       | 45.2     | (43.7-46.7)       | 42.7     | (41.4-44.1)       | 38.5     | (37.0-40.0)       | 45.1     | (43.5-46.8)       |

|           | GH       |                   | PF       |                   | RP       |                   | BP       |                   | VT       |                   | SF       |                   | MH       |                   | RE       |                   | PCS-8    |                   | MCS-8    |                   |
|-----------|----------|-------------------|----------|-------------------|----------|-------------------|----------|-------------------|----------|-------------------|----------|-------------------|----------|-------------------|----------|-------------------|----------|-------------------|----------|-------------------|
|           | <i>M</i> | 95%-<br><i>CI</i> |
| Men       |          | (42.6-            |          | (40.1-            |          | (41.0-            |          | (46.4-            |          | (45.2-            |          | (44.0-            |          | (47.4-            |          | (44.3-            |          | (40.3-            |          | (47.5-            |
|           | 43.4     | 44.2)             | 41.4     | 42.7)             | 42.3     | 43.6)             | 47.8     | 49.2)             | 46.2     | 47.2)             | 45.5     | 47.0)             | 48.7     | 50.0)             | 45.5     | 46.6)             | 41.8     | 43.2)             | 48.9     | 50.4)             |
| Total     |          | (41.7-            |          | (39.2-            |          | (40.0-            |          | (44.6-            |          | (44.3-            |          | (43.0-            |          | (45.9-            |          | (43.2-            |          | (39.1-            |          | (45.9-            |
|           | 42.4     | 43.0)             | 40.2     | 41.1)             | 40.9     | 42.0)             | 45.6     | 46.7)             | 45.0     | 45.8)             | 44.1     | 45.2)             | 46.9     | 47.9)             | 44.1     | 45.0)             | 40.1     | 41.2)             | 47.0     | 48.1)             |
| 85+ years |          |                   |          |                   |          |                   |          |                   |          |                   |          |                   |          |                   |          |                   |          |                   |          |                   |
| Women     |          | (38.9-            |          | (33.9-            |          | (34.0-            |          | (39.7-            |          | (39.9-            |          | (38.5-            |          | (43.1-            |          | (38.7-            |          | (32.4-            |          | (42.3-            |
|           | 40.2     | 41.4)             | 35.7     | 37.5)             | 35.9     | 37.8)             | 41.7     | 43.7)             | 41.6     | 43.3)             | 40.8     | 43.0)             | 45.1     | 47.1)             | 40.6     | 42.6)             | 34.5     | 36.7)             | 44.5     | 46.7)             |
| Men       |          | (41.0-            |          | (36.3-            |          | (38.3-            |          | (43.7-            |          | (43.6-            |          | (42.2-            |          | (46.5-            |          | (42.6-            |          | (36.7-            |          | (46.6-            |
|           | 42.1     | 43.1)             | 38.0     | 39.7)             | 39.9     | 41.6)             | 45.6     | 47.4)             | 44.9     | 46.2)             | 44.2     | 46.2)             | 48.2     | 49.9)             | 44.3     | 46.0)             | 38.5     | 40.3)             | 48.5     | 50.5)             |
| Total     |          | (40.3-            |          | (35.7-            |          | (36.8-            |          | (42.5-            |          | (42.3-            |          | (41.1-            |          | (45.3-            |          | (41.2-            |          | (35.3-            |          | (45.1-            |
|           | 41.2     | 42.0)             | 36.9     | 38.1)             | 38.1     | 39.3)             | 43.8     | 45.2)             | 43.4     | 44.5)             | 42.6     | 44.1)             | 46.7     | 48.0)             | 42.5     | 43.8)             | 36.7     | 38.1)             | 46.6     | 48.1)             |
| Total     |          |                   |          |                   |          |                   |          |                   |          |                   |          |                   |          |                   |          |                   |          |                   |          |                   |
| Women     |          | (43.8-            |          | (42.8-            |          | (43.6-            |          | (46.8-            |          | (46.5-            |          | (44.7-            |          | (46.2-            |          | (44.5-            |          | (43.3-            |          | (46.2-            |
|           | 44.2     | 44.6)             | 43.3     | 43.9)             | 44.1     | 44.6)             | 47.3     | 47.9)             | 46.9     | 47.4)             | 45.2     | 45.8)             | 46.7     | 47.3)             | 45.0     | 45.5)             | 43.9     | 44.5)             | 46.8     | 47.4)             |
| Men       |          | (44.6-            |          | (43.9-            |          | (44.7-            |          | (48.9-            |          | (47.9-            |          | (46.4-            |          | (48.9-            |          | (46.0-            |          | (44.5-            |          | (49.1-            |
|           | 44.9     | 45.3)             | 44.4     | 44.9)             | 45.2     | 45.8)             | 49.4     | 50.0)             | 48.3     | 48.7)             | 47.0     | 47.6)             | 49.4     | 49.9)             | 46.5     | 46.9)             | 45.1     | 45.6)             | 49.6     | 50.2)             |
| Total     |          | (44.3-            |          | (43.5-            |          | (44.3-            |          | (47.9-            |          | (47.3-            |          | (45.7-            |          | (47.6-            |          | (45.4-            |          | (44.0-            |          | (47.8-            |
|           | 44.5     | 44.8)             | 43.8     | 44.2)             | 44.7     | 45.0)             | 48.3     | 48.7)             | 47.6     | 47.9)             | 46.1     | 46.5)             | 48.0     | 48.4)             | 45.7     | 46.0)             | 44.5     | 44.9)             | 48.2     | 48.6)             |

Note. **GH** General Health **PF** Physical Functioning **RP** Role Physical **BP** Bodily Pain **VT** Vitality **SF** Social Functioning **RE** Role Emotional **MH** Mental Health **PCS** Physical Summary Scales **MCS** Mental Summary Scales

**Table S4.** Mean scores of the SF-8 subscales for the LAB60+ population and the German normal sample by age and gender

|                    | <b>GH</b> | <b>PF</b> | <b>RP</b> | <b>BP</b> | <b>VT</b> | <b>SF</b> | <b>MH</b> | <b>RE</b> | <b>PCS-8</b> | <b>MCS-8</b> |
|--------------------|-----------|-----------|-----------|-----------|-----------|-----------|-----------|-----------|--------------|--------------|
| <b>60-69 years</b> |           |           |           |           |           |           |           |           |              |              |
| Women              |           |           |           |           |           |           |           |           |              |              |
| LAB60+             | 46.4      | 47.1      | 47.6      | 50.6      | 49.4      | 47.3      | 47.4      | 46.6      | 48.5         | 47.6         |
| Normal sample*     | 45.5      | 47.4      | 47.9      | 48.6      | 49.4      | 51.6      | 50.5      | 49.0      | 47.2         | 51.7         |
| Men                |           |           |           |           |           |           |           |           |              |              |
| LAB60+             | 46.5      | 47.3      | 47.6      | 51.3      | 50.0      | 48.0      | 49.4      | 47.1      | 48.3         | 49.5         |
| Normal sample*     | 46.0      | 48.0      | 48.7      | 50.9      | 50.1      | 52.6      | 52.5      | 49.4      | 48.2         | 53.4         |
| <b>70-79 years</b> |           |           |           |           |           |           |           |           |              |              |
| Women              |           |           |           |           |           |           |           |           |              |              |
| LAB60+             | 44.3      | 43.4      | 44.5      | 47.1      | 47.0      | 45.2      | 47.2      | 45.4      | 43.9         | 47.3         |
| Normal sample*     | 44.1      | 45.5      | 46.0      | 47.3      | 48.2      | 51.6      | 50.5      | 48.1      | 44.8         | 51.6         |
| Men                |           |           |           |           |           |           |           |           |              |              |
| LAB60 +            | 44.8      | 44.4      | 45.6      | 49.1      | 48.6      | 47.5      | 50.4      | 47.2      | 44.9         | 50.8         |
| Normal sample*     | 45.0      | 46.9      | 48.2      | 50.0      | 50.2      | 52.4      | 52.9      | 49.1      | 47.2         | 53.7         |
| <b>80+ years</b>   |           |           |           |           |           |           |           |           |              |              |
| Women              |           |           |           |           |           |           |           |           |              |              |
| LAB60+             | 41.2      | 38.4      | 39.1      | 43.4      | 43.7      | 42.6      | 45.2      | 42.3      | 37.9         | 45.1         |
| Normal sample*     | 42.5      | 43.2      | 43.9      | 44.7      | 47.3      | 51.1      | 49.7      | 46.5      | 41.7         | 52.3         |
| Men                |           |           |           |           |           |           |           |           |              |              |
| LAB60+             | 43.2      | 41.0      | 42.1      | 47.4      | 46.0      | 45.3      | 48.5      | 45.1      | 41.4         | 48.7         |
| Normal sample*     | 44.2      | 46.1      | 45.5      | 49.3      | 44.5      | 52.4      | 52.1      | 48.2      | 44.5         | 52.3         |

\*Normal sample of the German population from Ellert et al. 2005

**Table S5.** WHO 5 mean weighted scores by 5-year age groups and gender.

|           | <b>WHO-5</b> |               |
|-----------|--------------|---------------|
|           | <i>Mean</i>  | <i>95%-CI</i> |
| 60-64 yrs |              |               |
| Women     | 58.2         | (55.3 - 61.1) |
| Men       | 59.2         | (56.4 - 62.1) |
| Total     | 58.6         | (56.6 - 60.7) |
| 65-69 yrs |              |               |
| Women     | 60.6         | (57.7 - 63.6) |
| Men       | 64.9         | (62.1 - 67.7) |
| Total     | 62.7         | (60.7 - 64.7) |
| 70-74 yrs |              |               |
| Women     | 57.9         | (54.7 - 61.1) |
| Men       | 65.9         | (62.4 - 69.4) |
| Total     | 61.4         | (59.0 - 63.8) |
| 75-79 yrs |              |               |
| Women     | 54.2         | (51.2 - 57.1) |
| Men       | 61.9         | (58.9 - 64.9) |
| Total     | 57.8         | (55.6 - 59.9) |
| 80-84 yrs |              |               |
| Women     | 48.9         | (45.2 - 52.7) |
| Men       | 58.3         | (54.9 - 61.7) |
| Total     | 53.6         | (51.0 - 56.2) |
| 85+ yrs   |              |               |
| Women     | 45.3         | (40.4 - 50.2) |
| Men       | 57.0         | (53.1 - 60.9) |
| Total     | 51.8         | (48.6 - 54.9) |
| Total     |              |               |
| Women     | 55.3         | (54.0 - 56.7) |
| Men       | 61.4         | (60.1 - 62.7) |
| Total     | 58.3         | (57.3 - 59.2) |

**Figure S1.** Number of household members (including the respondent) in the study population by age and gender

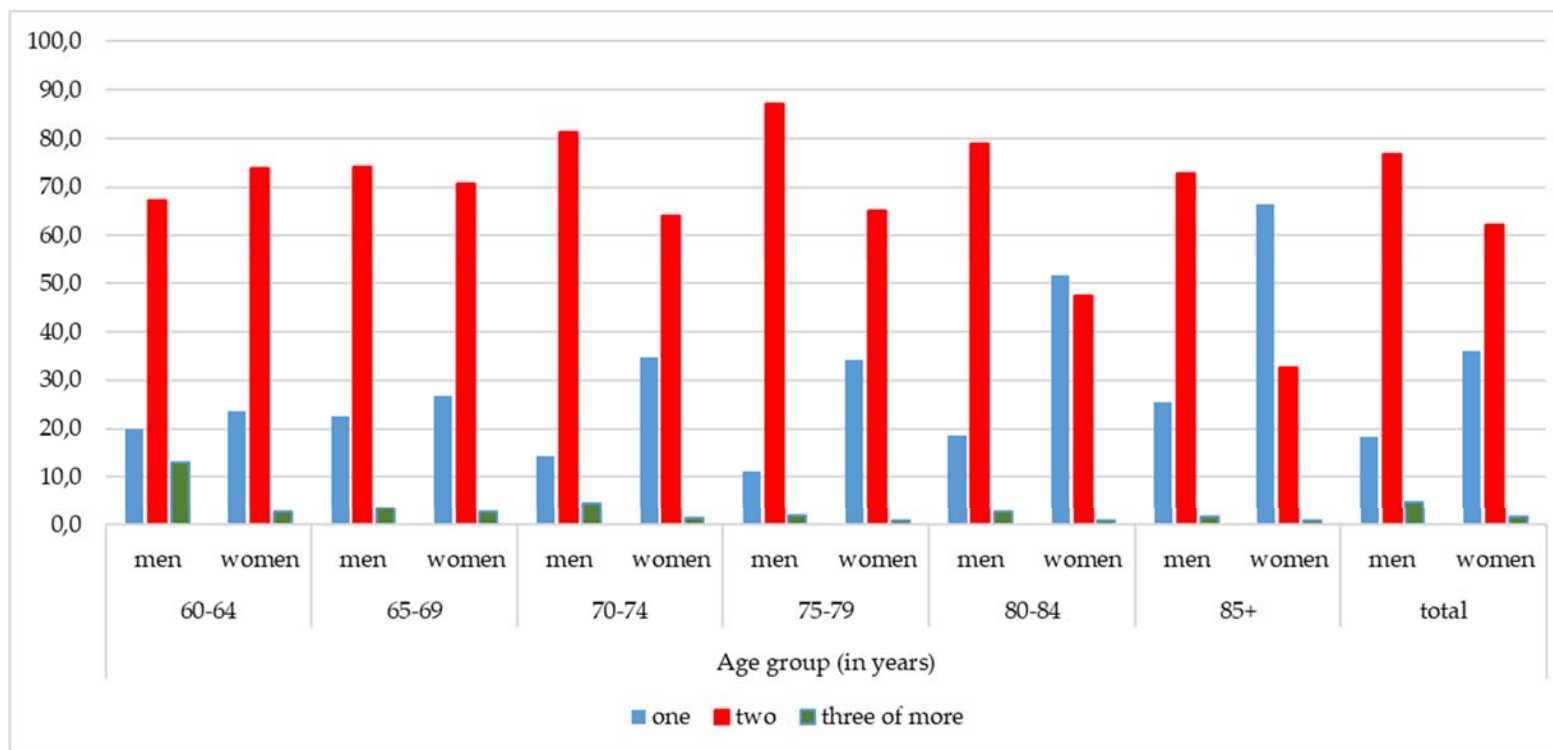

Supplement: s1 [file s1]
